# Supplementary material for: Cognitive Function in Children With Type 1 Diabetes
Source: Oxford University Press journal article supplement (doi:10.2337/dc07-2132), 2008-08-27
Supplement: dc072132-sup-2132appendix.doc [file dc072132-sup-2132appendix.doc]

Table 1 –Cognitive function in children with TID: Study characteristics.

| **References** | **Year** | | **N (D)/(C)** | | **Age (D)/(C) yrs** | | **Subjects** | | **Duration** | | **Onset** | **Cognitive Domain Assessed** | |  |
| --- | --- | --- | --- | --- | --- | --- | --- | --- | --- | --- | --- | --- | --- | --- |
|  |  | |  | |  | | **Matched For** | | **(years)** | | **(years)** |  | |  |
| **Studies of diabetes versus control comparisons:** | | | | | | | | | | | | | |  |
| Ryan, Vega, Drash (3) | 1985 | | 125/83 | | 14.9(2.2)/14.67(2.4) | | Sibs/SES | | 8.91(2.4) | | 5.98(1.7) | 1a, 1b, 2a, 2b, 3b, 4, 5 | |  |
| Rovet, Ehrlich, Hoppe (5) | 1988 | | 51/30 | | 9.8(2.4)/10.1(2.9) | | Sibs/SES | | 5.71(---) | | 4.13(1.4) | 1a, 1b, 5, 6 | |  |
| Reich et al. (13) | 1990 | | 10/14 | | 12.2(---)/11.2(---) | | A/SES | | 6.61(---) | | 6.06(---) | 3b, 4 | |  |
| Rovet, Ehrlich, Czuchta (11) | 1990 | | 63/40 | | 7.32(4.3)/8.17(3.8) | | Sibs/SES | | 0-1year | | (---) | 1a, 1b, 3a, 3b, 4, 5, 6 | |  |
| Holmes, Dunlap, Chen & | 1992 | | 95/97 | | 12.47(2.5)/ | | A/SES | | 4.91(3.6) | | 7.2(3.3) | 1a, 1b, 3a, 4 | |  |
| Cornwell (14) |  | |  | | 12.63(2.5) | |  | |  | |  |  | |  |
| Kovacs, Ryan, & Obrosky | 1994 | | 57/28 | | 18.9(2.6) | | SES | | (---) | | (---) | 2a | |  |
| (15) |  | |  | |  | |  | |  | |  |  | |  |
| Crawford et al. (16) | 1995 | | 27/27 | | 12.4(3.0)/12.1(3.7) | | Sibs/SES | | (---) | | >5years | 1a, 1b, 3a, 3b, 4, 5 | |  |
| Hershey et al. (17) | 1999 | | 25/16 | | 14.1(2.8)/14.7(2.8) | | A | | 2.3(0.6) | | 11.8(2.8) | 1a, 1b, 4 | |  |
| Kaufman et al. (12) | 1999 | | 55/15 | | 7.9(1.6)/7.5(1.8) | | Sibs/A/SES | | 2.6(2.0) | | 4.5(2.1) | 1a, 1b, 2a, 2b, 3a, 3b, 4, 5, 6 | |  |
| Northam et al. (6) | 2001 | | 90/73 | | 12.1(2.9)/12.1(2.8) | | A/SES | | 6.37(0.5) | | 5.77(2.8) | 1a, 1b, 2a, 2b, 3a, 4 | |  |
| McCarthy et al. (18) | 2002 | | 110/110 | | 14.7(2.7)/14.6(3.2) | | Sibs/SES | | 7.1(3.8) | | 8.3(3.4) | 5 | |  |
| Fox, Chen, Holmes (19) | 2003 | | 132/118 | | 15.9(2.6)/16.2(2.4) | | A/SES | | 8.1(3.1) | | 7.7(3.0) | 1a, 1b, 2a, 2b, 3a, 3b, 4, 5, 6 | |  |
| Hannonen et al (20) | 2003 | | 21/10 | | 9.3(2.1)/9.23(1.8) | | A/SES | | 4.99(2.0) | | 4.31(1.9) | 1a, 1b, 2a, 2b, 3a, 3b, 4, 6 | |  |
| Hershey et al. (8) | 2003 | | 51/32 | | 11.7(2.7)/11.5(2.8) | | (---) | | 4.7(2.9) | | 7(3.6) | 2a, 2b, 3b, 4 | |  |
| Perantie et al. (21) | 2008 | | 117/58 | | 12.1(2.9)/11.4(3.2) | | Sibs/SES | | (---) | | 6.8(3.3) | 1a, 1b, 2a, 2b | |  |
| **Studies of disease subgroup comparisons:** | | | | | | | | | | | | | |  |
| **Author(s) (ref)** | | **Risk Factor** | | **N Subgroups** | | **Age (years)** | | **Duration(years)** | | **Onset (years)** | | | **Cognitive Domains Assessed** | |
| Ryan, Vega, Drash (1985) (3) | | DO | | EOD = 46; LOD = 79 | | 14.9(2.2) | | 8.91(2.4) | | 5.98(1.70) | | | 1a, 1b, 2a, 2b, 3b, 4, 5 | |
| Holmes & Richman (1985) (4) | | DO | | EOD = 22; LOD = 20 | | 12.3(3) | | 6.02(3.3) | | 7(2.9) | | | 1a, 1b | |
| Rovet et al. (1988) (5) | | DO | | EOD = 27; LOD = 24 | | 9.8(2.4) | | 5.71(---) | | 4.13(1.4) | | | 1a, 1b, 5, 6 | |
| Kaufman et al. (1999) (12) | | SZ | | +SZ = 8; -SZ = 48 | | 7.9(1.6) | | 2.6(2.0) | | 4.5(2.1) | | | 2a | |
| Northam et al. (2001) (6) | | DO | | EOD = 33; LOD = 57 | | 12.1(2.9) | | 6.37(0.5) | | 5.77(2.8) | | | 1a, 1b, 2a, 2b, 3a, 4 | |
|  | | SZ | | +SZ = 25; -SZ = 65 | |  | |  | |  | | |  | |
| McCarthy et al. (2002) (18) | | DO | | EOD = 16; LOD = 74 | | 14.7(2.7) | | 7.1(3.8) | | 8.3(3.4) | | | 5 | |
| Fox et al. (2003) (19) | | DO | | EOD = 44; LOD = 88 | | 15.9(2.6) | | 8.1(3.1) | | 7.7(3.0) | | | 1a, 1b, 2a, 2b, 3a, 3b, 4, 5, 6 | |
|  | | SZ | | +SZ = 25; -SZ = 102 | |  | |  | |  | | |  | |
| Hannonen et al. (2003) (20) | | SZ | | +SZ = 11; -SZ = 10 | | 9.3(2.1) | | 4.99(2.0) | | 4.31(1.9) | | | 1a, 1b, 2a, 2b, 3a, 3b, 4, 6 | |
| Hershey et al. (2003) (8) | | SZ | | +SZ = 34; -SZ = 16 | | 11.7(2.7) | | 4.7(2.9) | | 7(3.6) | | | 2a, 2b, 3b, 4 | |
| Wysocki et al. (2003) (9) | | SZ | | +SZ = 58; -SZ = 84 | | 11.6(2.7) | | 5.0(2.9) | | 7.6(---) | | | 1a, 1b, 2a, 2b, 4 | |
| Strudwick et al. (2005) (10) | | SZ | | +SZ = 41; -SZ = 43 | | 10.3(2.5) | | 7.3(2.9) | | 3.1(1.1) | | | 1a, 1b, 2a, 2b, 3a, 4 | |
| Holmes et al. (2006) (22) | | DO | | EOD = 44; LOD = 194 | | 13.5(2.0) | | 4.9(3.3) | | 8.61(3.8) | | | 1a, 1b, 2a, 2b, 3a, 3b, 4, 5 | |
|  | | SZ | | +SZ = 41; -SZ = 172 | |  | |  | |  | | |  | |
| Perantie et al. (2008) (21) | | SZ | | +SZ = 67; -SZ = 50 | | 12.1(2.9) | | (---) | | 6.8(3.3) | | | 1a, 1b, 2a, 2b | |

Data are means + SD, unless otherwise indicated. D = Type 1 Diabetes; C = Control subjects; DO = disease onset; +SZ = hypoglycemic seizures present; -SZ = hypoglycemic seizures absent; EOD = early disease onset; LOD = late disease onset; 1a = crystallized intelligence; 1b = fluid intelligence; 2a = verbal memory and learning; 2b = visual memory & learning; 3a = psychomotor efficiency; 3b = motor speed; 4 = attention/executive function; 5 = academic achievement; 6 = visual motor integration; Sibs = siblings; SES = socioeconomic status; A = Age; (---) = data not presented in original publication.
